# Supplementary material for: O-fucosylation of the Notch Ligand mDLL1 by POFUT1 Is Dispensable for Ligand Function
Source: PubMed Central journal article supplement (PMC3922938; doi:10.1371/journal.pone.0088571), 2014-02-12

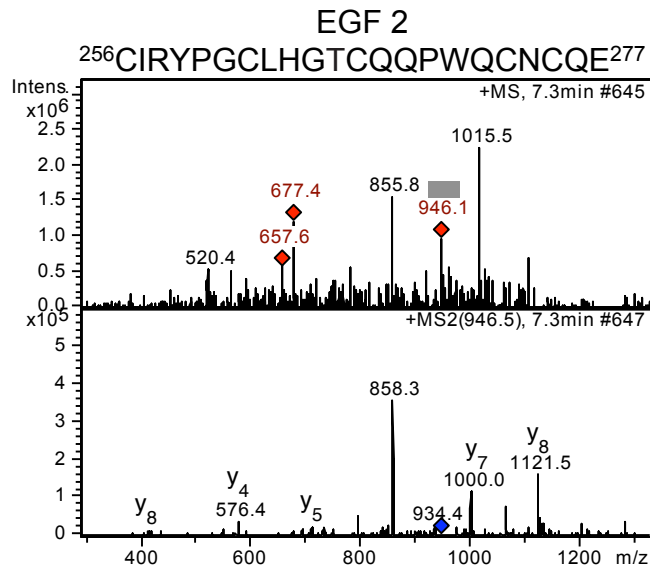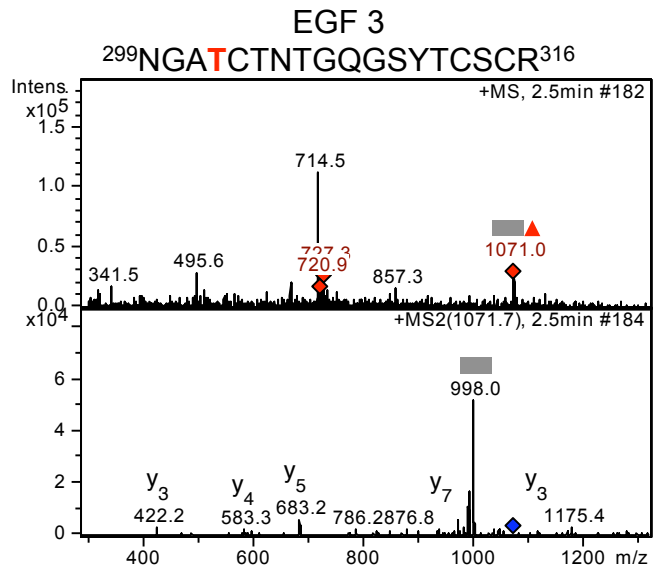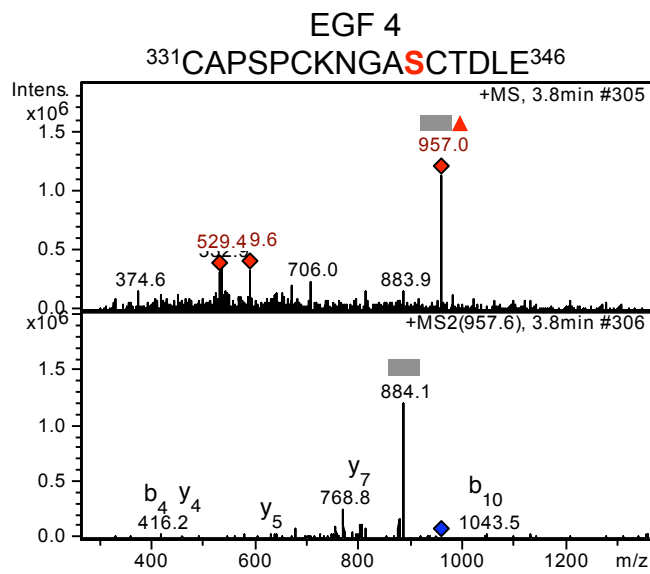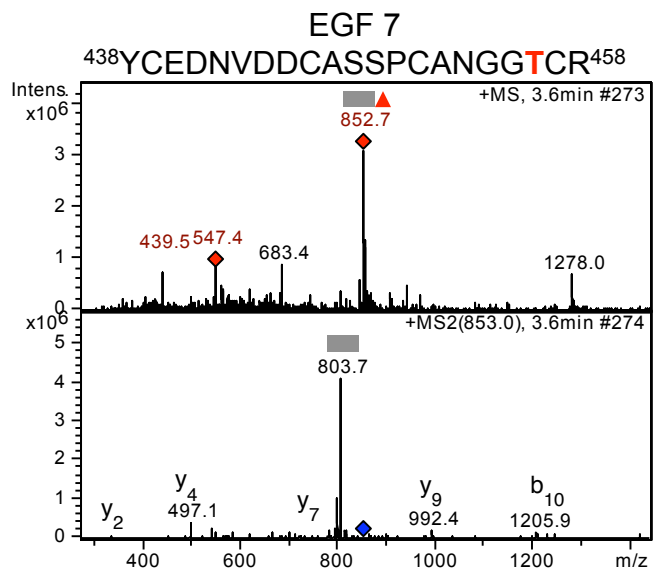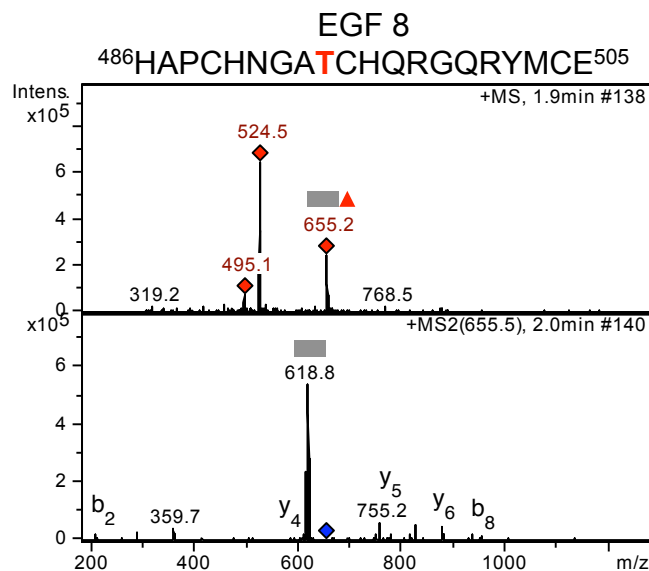

Supplement: pone.0088571.s001.pdf [file pone.0088571.s001.pdf]
